# Supplementary material for: Soil lacquer peel do-it-yourself: simply capturing beauty
Source: Copernicus journal article supplement (doi:10.5194/soil-5-159-2019), 2019-07-09
Supplement: Supplementary file 1 [file soil-5-159-2019-supplement.zip]

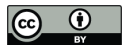

## *Supplement of*

# **Soil lacquer peel do-it-yourself: simply capturing beauty**

**Cathelijne R. Stoof et al.**

*Correspondence to:* Cathelijne R. Stoof ([cathelijne.stoof@wur.nl](mailto:cathelijne.stoof@wur.nl))

- [soil-5-159-2019-supplement-title-page.pdf](#)
- [Stoof et al - laquer\\_profile\\_diy\\_final\\_17082018\\_480p.mp4](#)

The copyright of individual parts of the supplement might differ from the CC BY 4.0 License.
